# Supplementary material for: Bilosomes as Nanoplatform for Oral Delivery and Modulated In Vivo Antimicrobial Activity of Lycopene
Source: MDPI journal article supplement (doi:10.3390/ph15091043), 2022-08-24
Supplement: s1 [file s1]

**Table S1.** The inhibition zone diameters of the free lycopene, its formulations, and the non-medicated formulations.

| Isolate Code | Inhibition zone dimeters (mm)* |            |                       |            |                       |            |                       |            |                       |
|--------------|--------------------------------|------------|-----------------------|------------|-----------------------|------------|-----------------------|------------|-----------------------|
|              | Free lycopene                  | F1 formula | F1 non – medicated ** | F2 formula | F2 non – medicated ** | F3 formula | F3 non – medicated ** | F4 formula | F4 non – medicated ** |
| K1           | 8.3±0.4                        | 21±0.0     | -                     | 23±0.0     | -                     | 12.6±0.4   | -                     | 13±0.      | -                     |
| K2           | 8±0.8                          | 18±0.0     | -                     | 21.3±0.4   | -                     | 11±0.0     | -                     | 13.6±0.4   | -                     |
| K3           | 9±0.0                          | 19±0.0     | -                     | 26±0.0     | -                     | 9.3±0.4    | -                     | 10±0.0     | -                     |
| K4           | 10.6±0.4                       | 21.3±0.4   | -                     | 23.6±0.4   | -                     | 13.3±0.4   | -                     | 13.6±0.4   | -                     |
| K5           | 10.3±0.4                       | 22±0.0     | -                     | 25±0.0     | -                     | 10.3±0.4   | -                     | 11±0.0     | -                     |
| K6           | 10.3±0.4                       | 23.6±0.4   | -                     | 23±0.0     | -                     | 11.3±0.4   | -                     | 11±0.0     | -                     |
| K7           | 7.3±0.4                        | 26.6±0.4   | -                     | 27.3±0.4   | -                     | 11±0.0     | -                     | 11.6±0.4   | -                     |
| K8           | 11.3±0.4                       | 27.3±0.4   | -                     | 28±0.0     | -                     | 11.6±0.4   | -                     | 13±0.0     | -                     |
| K9           | 8±0.0                          | 23±0.0     | -                     | 25±0.0     | -                     | 9±0.0      | -                     | 10±0.0     | -                     |
| K10          | 9±0.0                          | 25±0.0     | -                     | 28±0.0     | -                     | 9±0.0      | -                     | 11±0.0     | -                     |
| K11          | 8±0.0                          | 23.6±0.4   | -                     | 26±0.0     | -                     | 13.6±0.4   | -                     | 14.3±0.4   | -                     |
| K12          | 11±0.0                         | 19±0.0     | -                     | 20.6±0.4   | -                     | 13.6±0.4   | -                     | 13.6±0.4   | -                     |
| K13          | 12±0.0                         | 20.6±0.4   | -                     | 26±0.0     | -                     | 13±0.0     | -                     | 14±0.0     | -                     |
| K14          | 7.3±0.4                        | 21±0.0     | -                     | 28±0.0     | -                     | 10±0.0     | -                     | 10±0.0     | -                     |
| K15          | 8±0.0                          | 26±0.0     | -                     | 26±0.0     | -                     | 9.6±0.4    | -                     | 8±0.8      | -                     |
| K16          | 8±0.0                          | 25±0.0     | -                     | 28±0.0     | -                     | 11±0.0     | -                     | 12±0.0     | -                     |
| K17          | 9±0.0                          | 23.6±0.4   | -                     | 26.6±0.4   | -                     | 9±0.0      | -                     | 11±0.0     | -                     |
| K18          | 7±0.0                          | 26±0.0     | -                     | 27±0.0     | -                     | 10.3±0.4   | -                     | 7.3±0.4    | -                     |
| K19          | 11.3±0.4                       | 23±0.0     | -                     | 24.3±0.4   | -                     | 12±0.0     | -                     | 13±0.0     | -                     |
| K20          | 12±0.0                         | 24.3±0.4   | -                     | 27±0.0     | -                     | 12±0.22    | -                     | 13.6±0.4   | -                     |
| K21          | 11.3±0.4                       | 26±0.0     | -                     | 27.3±0.4   | -                     | 11±0.0     | -                     | 11.6±0.4   | -                     |
| K22          | 9.6±0.4                        | 27±0.0     | -                     | 29±0.0     | -                     | 10.3±0.4   | -                     | 10±0.0     | -                     |
| K23          | 10.6±0.4                       | 27.3±0.4   | -                     | 28±0.0     | -                     | 12.3±0.4   | -                     | 13±0.0     | -                     |
| K24          | 9±0.0                          | 29±0.0     | -                     | 28±0.0     | -                     | 9±0.0      | -                     | 10.6±0.4   | -                     |
| K25          | 8±0.0                          | 23.6±0.4   | -                     | 25±0.0     | -                     | 9.6±0.4    | -                     | 12±0.0     | -                     |
| K26          | 12±0.0                         | 26±0.0     | -                     | 27.3±0.4   | -                     | 12.3±0.4   | -                     | 12±0.0     | -                     |
| K27          | 10.3±0.4                       | 27±0.0     | -                     | 29±0.0     | -                     | 11±0.0     | -                     | 11±0.8     | -                     |
| K28          | 11±0.8                         | 28.3±0.4   | -                     | 29±0.0     | -                     | 13.3±0.4   | -                     | 13±0.0     | -                     |
| K29          | 11.6±0.4                       | 23±0.0     | -                     | 23.6±0.4   | -                     | 12.6±0.4   | -                     | 12±0.0     | -                     |
| K30          | 12.3±0.4                       | 21.3±0.4   | -                     | 25±0.0     | -                     | 12.6±0.4   | -                     | 14±0.0     | -                     |
| K31          | 7.6±0.4                        | 19±0.0     | -                     | 20±0.0     | -                     | 10.3±0.4   | -                     | 11.6±0.4   | -                     |
| K32          | 9±0.0                          | 23.6±0.4   | -                     | 28.3±0.4   | -                     | 9.6±0.4    | -                     | 10.3±0.4   | -                     |

\* The results are expressed as mean± standard deviation

\*\* The non-medicated formulation didn't exhibit any inhibition zones around their disks.

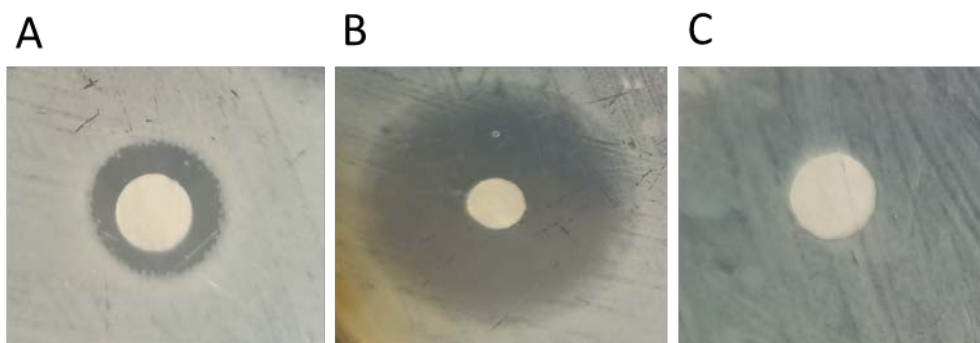

**Figure S1.** A representative example for the results of disc diffusion method of lycopene (A), F2 formula (B), and (C) non-medicated F2 formula.
